# Supplementary material for: Whole‐exome sequencing reveals a long‐term decline in effective population size of red spruce (Picea rubens)
Source: PubMed Central journal article supplement (PMC7513712; doi:10.1111/eva.12985), 2020-05-22

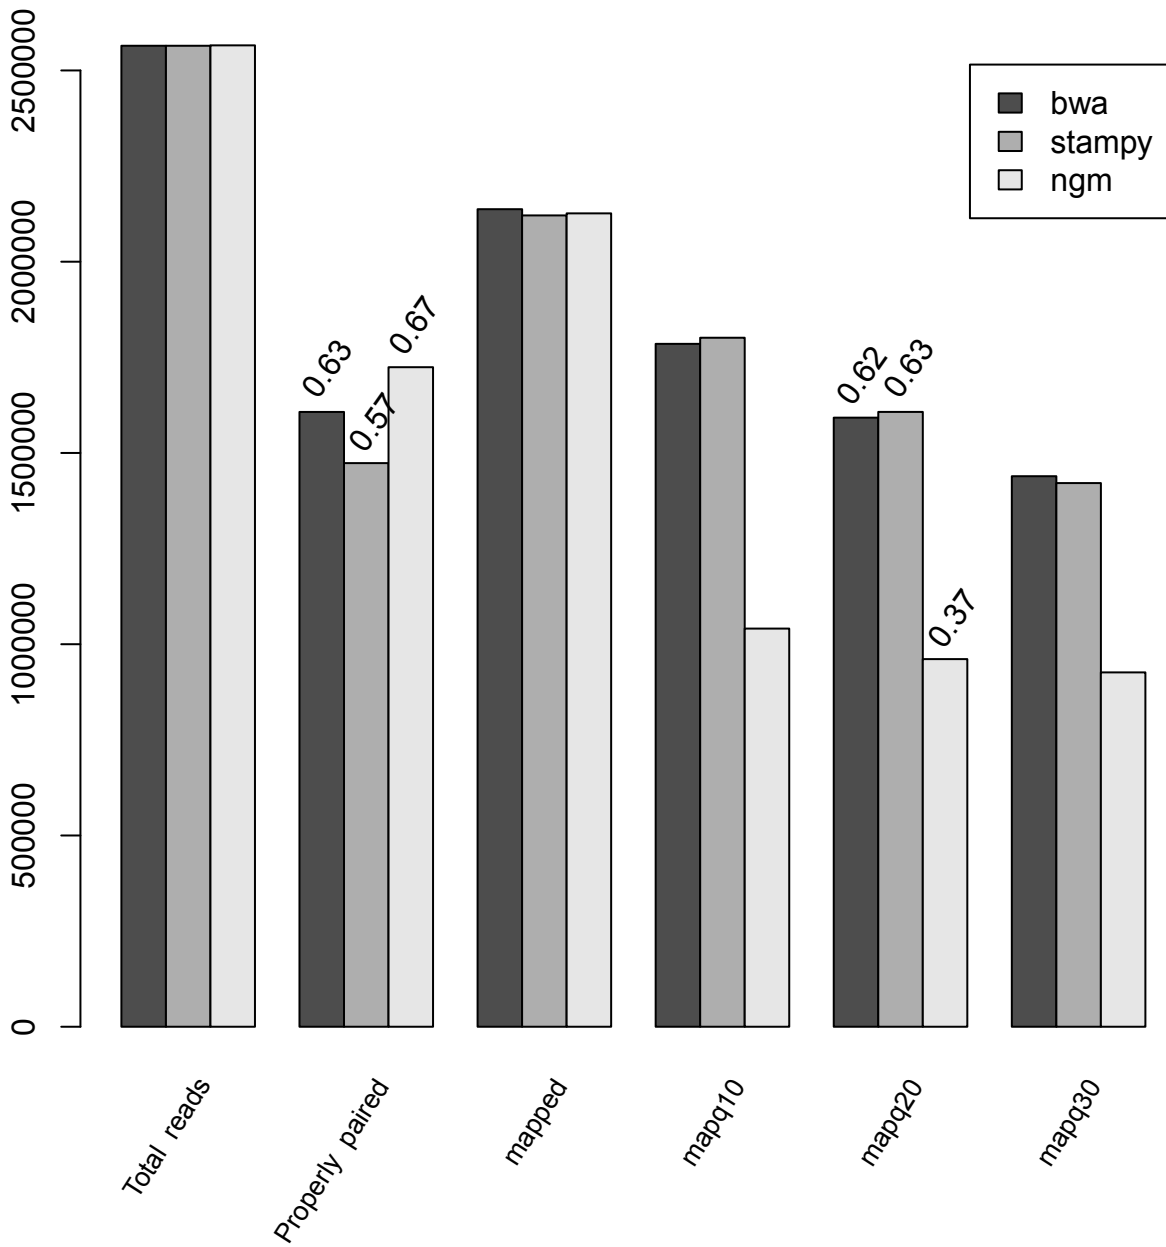

Supplement: EVA-13-2190-s001.pdf [file EVA-13-2190-s001.pdf]
