# Supplementary material for: Whole‐exome sequencing reveals a long‐term decline in effective population size of red spruce (Picea rubens)
Source: PubMed Central journal article supplement (PMC7513712; doi:10.1111/eva.12985), 2020-05-22
Supplement: EVA-13-2190-s006.pdf [file EVA-13-2190-s006.pdf]

| Population | Number of samples | State | Region | Latitude | Longitude | Elevation (m) |
|------------|-------------------|-------|--------|----------|-----------|---------------|
| AB         | 5                 | TN    | Edge   | 35.55    | 83.49     | 1812          |
| ALB        | 5                 | ME    | Core   | 44.31    | 70.84     | 455           |
| APP        | 6                 | VT    | Core   | 44.21    | 72.93     | 743           |
| ASC        | 6                 | VT    | Core   | 43.44    | 72.45     | 883           |
| B          | 5                 | VT    | Core   | 44.11    | 73.07     | 311           |
| BAL        | 6                 | NY    | Core   | 44.15    | 73.65     | 570           |
| BBE        | 5                 | NH    | Core   | 43.84    | 71.56     | 365           |
| BER        | 6                 | ME    | Core   | 44.69    | 70.38     | 481           |
| BFA        | 5                 | WV    | Edge   | 38.48    | 79.72     | 1348          |
| BLA        | 5                 | PA    | Margin | 41.11    | 75.60     | 475           |
| BRA        | 5                 | PA    | Margin | 41.16    | 75.54     | 520           |
| BRB        | 4                 | WV    | Edge   | 39.12    | 79.58     | 988           |
| BRU        | 5                 | PA    | Margin | 41.35    | 75.17     | 539           |
| CAM        | 6                 | VT    | Core   | 44.30    | 72.91     | 538           |
| CRR        | 5                 | PA    | Margin | 41.37    | 76.26     | 674           |
| CR         | 6                 | NC    | Edge   | 35.75    | 82.27     | 1819          |
| CRA        | 2                 | WV    | Edge   | 38.19    | 80.27     | 1072          |
| DG         | 5                 | NC    | Edge   | 35.78    | 82.26     | 1955          |
| EQU        | 6                 | VT    | Core   | 43.14    | 73.14     | 608           |
| ESC        | 6                 | NY    | Core   | 42.20    | 74.03     | 678           |
| G13        | 5                 | PA    | Margin | 41.41    | 76.30     | 641           |
| G18        | 3                 | PA    | Margin | 41.10    | 75.49     | 538           |
| G57        | 11                | PA    | Margin | 41.39    | 76.25     | 644           |
| GFM        | 5                 | NC    | Edge   | 36.09    | 81.84     | 1425          |
| GPA        | 4                 | WV    | Edge   | 38.62    | 79.84     | 1363          |
| GRE        | 6                 | MA    | Core   | 42.64    | 73.17     | 929           |
| HR         | 7                 | TN    | Edge   | 35.57    | 83.18     | 1615          |
| HUN        | 7                 | NY    | Core   | 42.18    | 74.23     | 1221          |
| IND        | 6                 | NY    | Core   | 42.17    | 74.20     | 646           |
| JAY        | 3                 | VT    | Core   | 44.93    | 72.53     | 900           |
| KAN        | 5                 | NH    | Core   | 44.03    | 71.50     | 862           |
| KIL        | 6                 | VT    | Core   | 43.61    | 72.82     | 1171          |
| KOS        | 6                 | WV    | Edge   | 38.69    | 79.54     | 1356          |
| LEU        | 5                 | ME    | Core   | 45.47    | 70.37     | 668           |
| LOL        | 5                 | NH    | Core   | 44.14    | 71.71     | 865           |
| MAC        | 5                 | NY    | Core   | 44.05    | 73.78     | 1317          |
| MMF        | 7                 | VT    | Core   | 44.52    | 72.80     | 887           |
| MPG        | 6                 | VT    | Core   | 44.73    | 72.03     | 826           |
| MRC        | 5                 | VA    | Edge   | 36.67    | 81.51     | 1600          |
| MSK        | 4                 | NH    | Core   | 44.43    | 71.43     | 1197          |
| MT         | 8                 | NC    | Edge   | 35.76    | 82.25     | 1711          |
| NBTIC      | 6                 | NB    | Core   | 46.22    | 67.14     | NA            |
| NOR        | 6                 | NY    | Core   | 42.22    | 74.04     | 919           |
| OCT        | 6                 | MA    | Core   | 42.36    | 73.16     | 582           |
| OKE        | 6                 | VT    | Core   | 43.41    | 72.75     | 812           |
| OWL        | 4                 | VT    | Core   | 44.30    | 72.29     | 580           |
| PRK        | 5                 | WV    | Edge   | 38.33    | 80.15     | 1440          |
| PRO        | 4                 | VT    | Core   | 44.53    | 72.87     | 448           |
| RP         | 5                 | TN    | Edge   | 35.61    | 83.45     | 1617          |
| SAV        | 7                 | MA    | Core   | 42.60    | 73.03     | 767           |
| SPR        | 5                 | PA    | Margin | 41.21    | 75.65     | 586           |
| TWI        | 5                 | NY    | Core   | 42.12    | 74.13     | 1064          |
| WA         | 5                 | NC    | Edge   | 35.34    | 83.35     | 1285          |
| WCA        | 6                 | NY    | Core   | 42.47    | 74.58     | 574           |
| WHI        | 6                 | NY    | Core   | 44.40    | 73.90     | 893           |
| XBM        | 6                 | PA    | Margin | 40.73    | 77.76     | 552           |
| XCS        | 2                 | WV    | Edge   | 39.53    | 79.48     | 777           |
| XCV        | 5                 | WV    | Edge   | 39.09    | 79.45     | 1141          |
| XDS        | 6                 | WV    | Edge   | 38.97    | 79.34     | 1201          |
| XFS        | 3                 | MD    | Edge   | 39.70    | 78.94     | 825           |
| XGL        | 4                 | MD    | Edge   | 39.51    | 79.28     | 815           |
| XPK        | 4                 | WV    | Edge   | 38.56    | 79.50     | 1340          |
| XSK        | 3                 | WV    | Edge   | 38.94    | 79.69     | 1127          |
| XWS        | 3                 | MD    | Edge   | 39.66    | 79.09     | 787           |
| YRB        | 5                 | PA    | Margin | 40.96    | 75.63     | 493           |
